# Supplementary material
Source: PubMed Central journal article supplement (PMC555976)

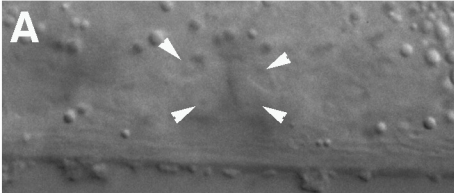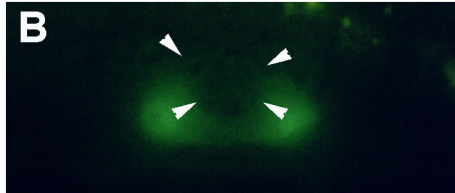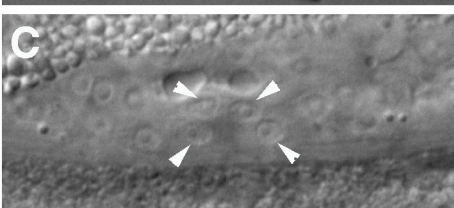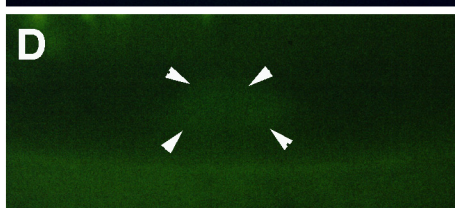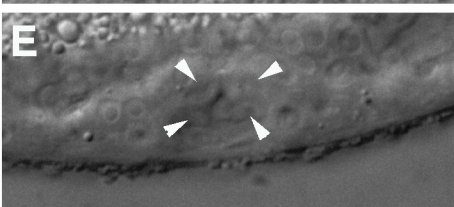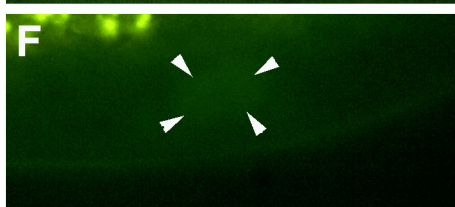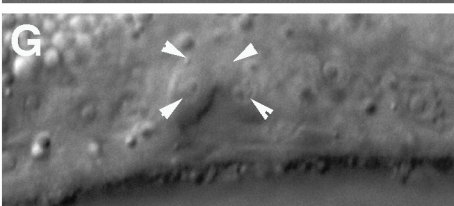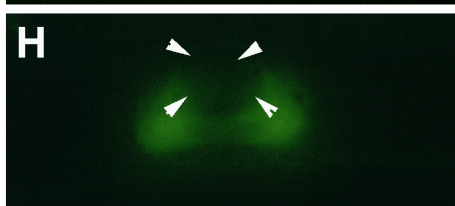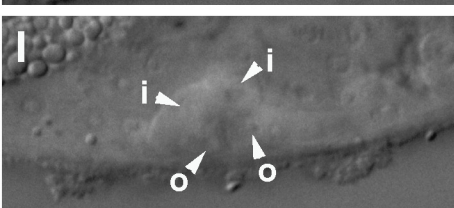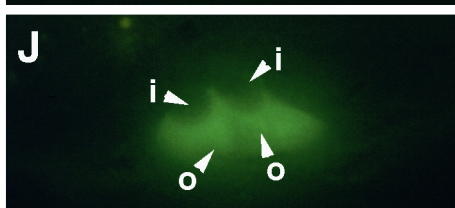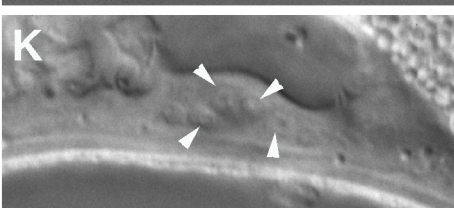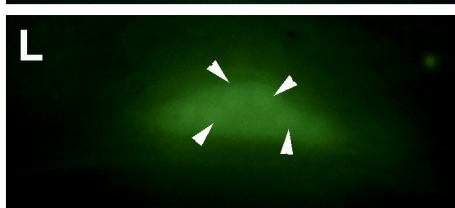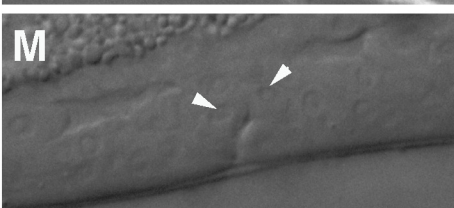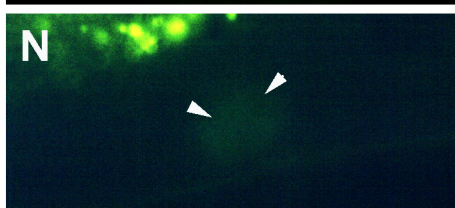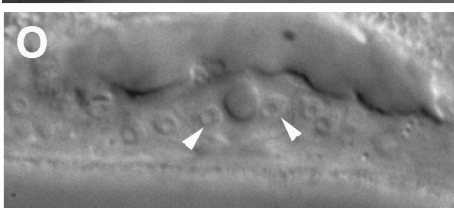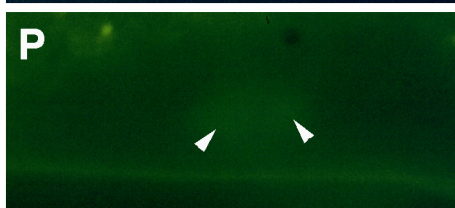

Supplement: pnas_102_14_4972__1.pdf [file pnas_102_14_4972__1.pdf]
